# Supplementary material
Source: MDPI journal article supplement (https://www.mdpi.com/2311-7524/8/6/543)
Supplement: s1 [file s1]

Archive with 7 entries (7 files):
- Figure S1.pdf
- Figure S2.pdf
- Figure S3.pdf
- Video S1.mp4
- Video S2.mp4
- Video S3.mp4
- Video S4.mp4
